# Supplementary material for: Insights into a crystallization-like activation mechanism of diatom biosilica as an anode for next-generation Li-ion batteries
Source: Royal Society of Chemistry journal article supplement (doi:10.1039/d3ta02678g), 2023-01-01
Supplement: d3ta02678g1.pdf [file d3ta02678g1.pdf]

## **Electronic Supplementary Information**

### **Insights into the crystallization-like activation mechanism of diatom biosilica as an anode for next-generation Li-ion batteries**

Yuxin Chen,<sup>a</sup> Hongchang Liu,<sup>\*ab</sup> Kang Yang,<sup>a</sup> Zhanyuan Nie,<sup>ab</sup> Jinlan Xia,<sup>ab</sup> Ze Shen,<sup>a</sup> Jianping Xie,<sup>ab</sup> and Hongwei Liu<sup>ab</sup>

<sup>a</sup> School of Minerals Processing and Bioengineering, Central South University, Changsha 410083, China.

<sup>b</sup> Key Lab of Biometallurgy of Ministry of Education of China, Central South University, Changsha 410083, China.

E-mail: [hchliu2050@csu.edu.cn](mailto:hchliu2050@csu.edu.cn)

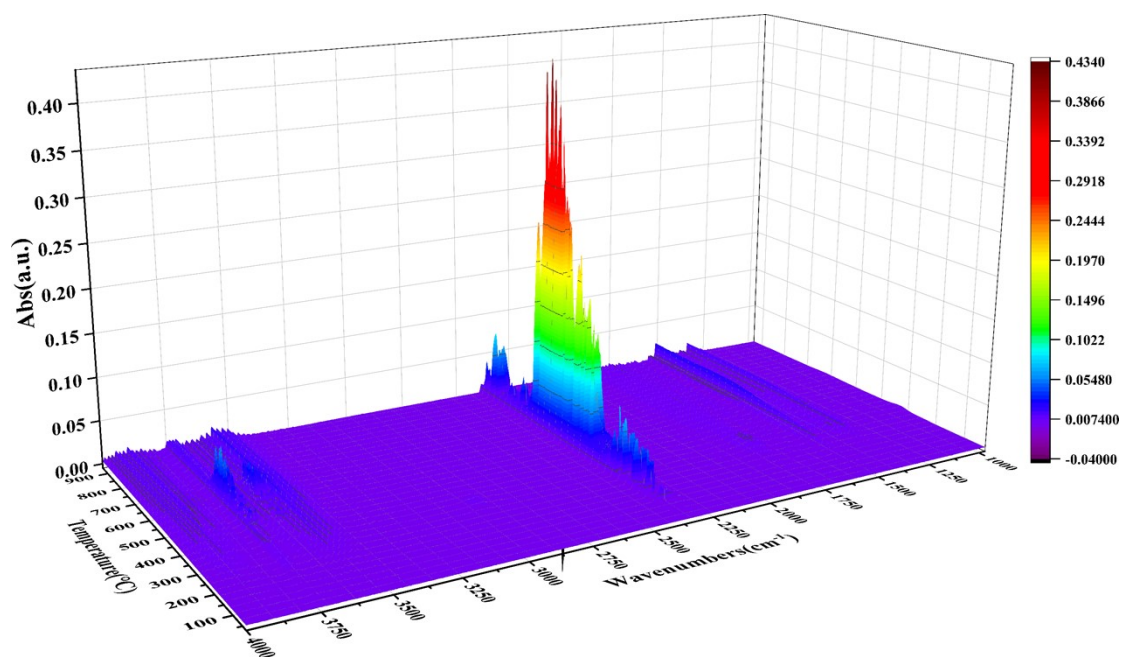

Fig. S1. *In-situ* 3D infrared image of diatom during the calcination.

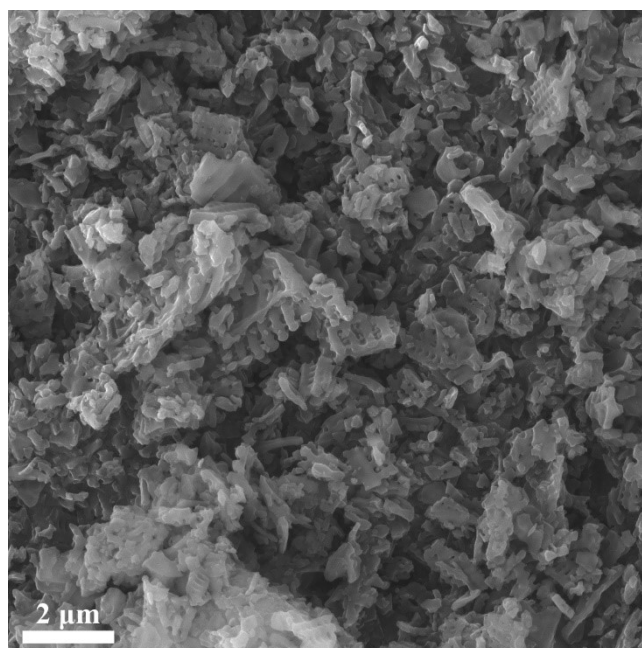

Fig. S2. SEM image of DBS.

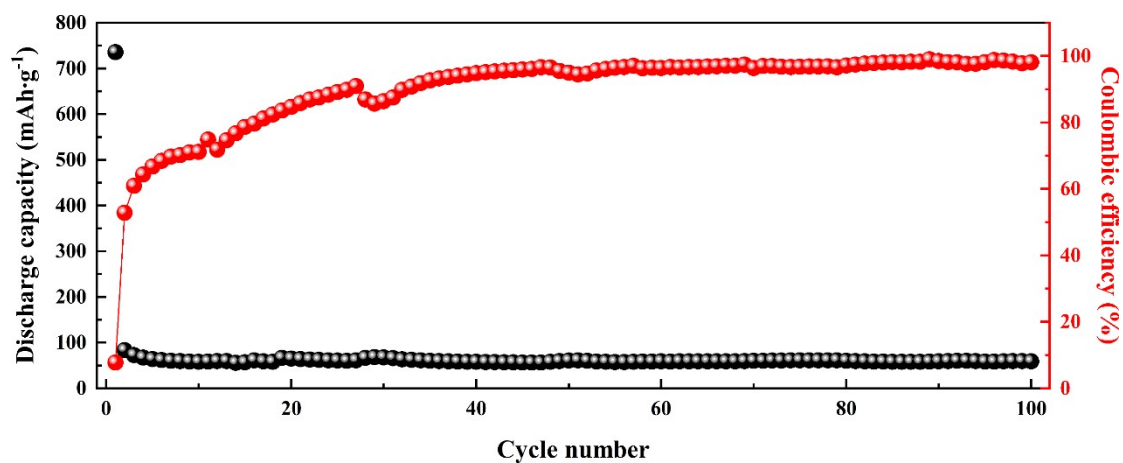

**Fig. S3.** Long-term cycle performance of DBS anode.

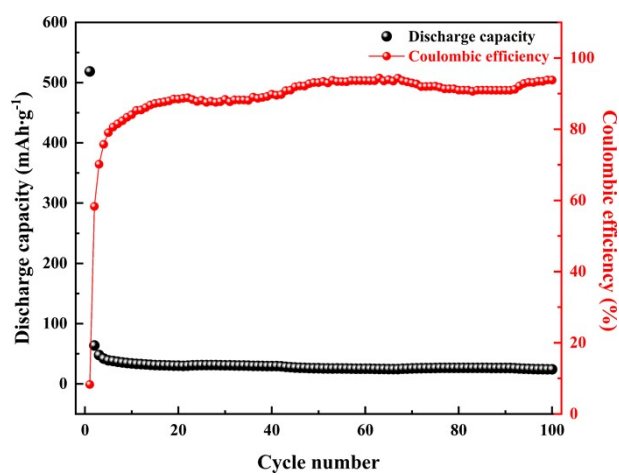

**Fig. S4.** Long-term cycle performance of SiO<sub>2</sub> anode.

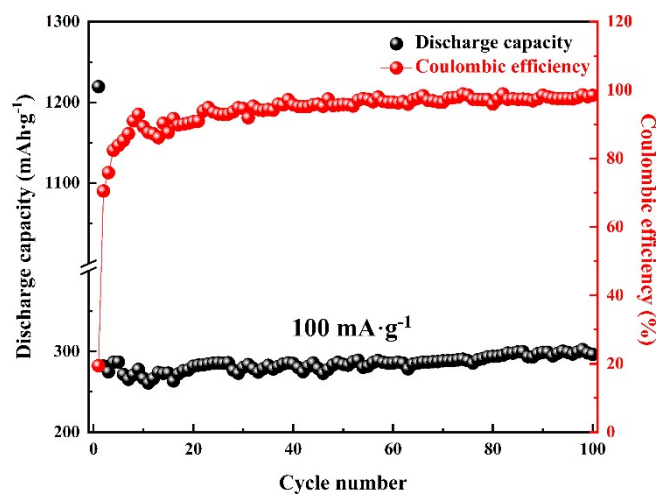

**Fig. S5.** Long-term cycle performance of DBS@C anode.

**Table S1.** Comparison of electrochemical properties of diatom-based anodes.

| Anode               | Long-term cycle performance                                        | Reference |
|---------------------|--------------------------------------------------------------------|-----------|
| This work           | ~900 mAh·g <sup>-1</sup> at 1 A·g <sup>-1</sup> after 400 cycles   | —         |
| DB@C                | 240 mAh·g <sup>-1</sup> at 500 mA·g <sup>-1</sup> after 50 cycles  | [1]       |
| SiO <sub>2</sub> /C | 614 mAh·g <sup>-1</sup> at 100 mA·g <sup>-1</sup> after 100 cycles | [2]       |
| DB/CB               | 409 mAh·g <sup>-1</sup> at 20 mA·g <sup>-1</sup> after 100 cycles  | [3]       |
| SiO <sub>2</sub> /C | 600 mAh·g <sup>-1</sup> at 200 mA·g <sup>-1</sup> after 50 cycles  | [4]       |
| DBS@C-Co            | 620 mAh·g <sup>-1</sup> at 100 mA·g <sup>-1</sup> after 270 cycles | [5]       |

## Reference

- 1 P. Nowak, M. Sprynskyy, I. Wojtczak, K. Trzcíński, J. Wysocka, M. Szkoda, B. Buszewski and A. Lisowska-Oleksiak, Diatoms Biomass as a Joint Source of Biosilica and Carbon for Lithium-Ion Battery Anodes, *Materials*, 2020, **13**, 1673.
- 2 V. Renman, M. V. Blanco, A. N. Norberg, F. Vullum-Bruer and A. M. Svensson, Electrochemical activation of a diatom-derived SiO<sub>2</sub>/C composite anode and its implementation in a lithium ion battery, *Solid State Ionics*, 2021, **371**, 115766.
- 3 P. Nowaka, M. Sprynskyy, W. Brzozowska and A. Lisowska-Oleksiak, Electrochemical behavior of a composite material containing 3D-structured diatom biosilica, *Algal Research*, 2017, **41**, 101538.
- 4 N. Norberg, N. P. Wagner, H. Kaland, F. Vullum-Bruer and A. M. Svensson, Silica from diatom frustules as anode material for Li-ion batteries, *RSC Advances*, 2019, **9**, 41228.
- 5 Y. X. Chen, H. C. Liu, W. Q. Xie, Z. Shen, J. L. Xia, Z. Y. Nie and J. P. Xie, Diatom Frustules Decorated with Co Nanoparticles for the Advanced Anode of Li-Ion Batteries, *Small*, 2023, **19**, 2300707.
